# Supplementary material for: Costs of migratory decisions: A comparison across eight white stork populations
Source: PubMed Central journal article supplement — Sci Adv. 2016 Jan 22;2(1):e1500931. doi: 10.1126/sciadv.1500931 (PMC4737271; doi:10.1126/sciadv.1500931), 2016-01-22
Supplement: 1500931_SM.pdf [file 1500931_SM.pdf]

## Supplementary Materials for

### **Costs of migratory decisions: A comparison across eight white stork populations**

Andrea Flack, Wolfgang Fiedler, Julio Blas, Ivan Pokrovsky, Michael Kaatz, Maxim Mitropolsky, Karen Aghababyan, Ioannis Fakriadis, Eleni Makrigianni, Leszek Jerzak, Hichem Azafzaf, Claudia Feltrup-Azafzaf, Shay Rotics, Thabiso M. Mokotjomela, Ran Nathan, Martin Wikelski

Published 22 January 2016, *Sci. Adv.* **2**, e1500931 (2016)

DOI: 10.1126/sciadv.1500931

#### **The PDF file includes:**

Table S1. Results of linear regression models concerning the effects of population on departure date.

Table S2. Results of linear regression models concerning the effects of population on maximum distance reached.

Table S3. GLMM model results for animal activity (ODBA) showing the effects of the main predictors. North of 33°N was incorporated in the intercept.

Table S4. GLMM model results concerning the effect of daily distance moved on the location of the wintering grounds.

Table S5. GLMM model results for animal activity (ODBA) showing the effects of human population density (log) and vegetation cover (centered).

## Supplementary Materials

**Table S1** Results of linear regression models concerning the effects of population on departure date

| population | Estimate   | SE   | t-value |
|------------|------------|------|---------|
| Armenia    | 01-09-2013 | 3.3  | 4797.9  |
| Greece     | -27.6      | 4.11 | -6.9    |
| Poland     | -15.3      | 5.0  | -3.1    |
| Russia     | -16.9      | 4.1  | -4.1    |
| Spain      | -36.2      | 4.1  | -8.7    |
| SW-Germany | -20.5      | 4.1  | -5.0    |
| Tunisia    | -30.2      | 4.1  | -7.3    |

**Table S2** Results of linear regression models concerning the effects of population on maximum distance reached

| population | Estimate | SE     | t-value |
|------------|----------|--------|---------|
| Armenia    | 989.2    | 910.3  | 1.09    |
| Greece     | 3609.2   | 1077.1 | 3.35    |
| Poland     | 5253.8   | 1287.4 | 4.08    |
| Russia     | 4776.8   | 1032.2 | 4.63    |
| Spain      | 1622.3   | 1175.2 | 1.38    |
| SW-Germany | 1724.9   | 1051.1 | 1.64    |
| Tunisia    | 2240.9   | 1114.9 | 2.01    |

**Table S3** GLMM model results for animal activity (ODBA) showing the effects of the main predictors. North of 33°N was incorporated in the intercept.

|                                     | Estimate | SE   | t-value |
|-------------------------------------|----------|------|---------|
| (Intercept)                         | 3.96     | 0.09 | 45.75   |
| Thermal Uplift (centered)           | -1.41    | 0.28 | -5.09   |
| South 33° N                         | -0.81    | 0.08 | -9.73   |
| South of 33° N x Thermal Uplift (c) | 1.54     | 0.30 | 5.13    |

**Table S4** GLMM model results concerning the effect of daily distance moved on the location of the wintering grounds.

|             | Estimate | SE   | t-value |
|-------------|----------|------|---------|
| South 33° N | 3.72     | 0.07 | 54.40   |
| North 33° N | -0.67    | 0.08 | -7.91   |
| Uzbekistan  | -0.13    | 0.15 | -0.86   |

**Table S5** GLMM model results for animal activity (ODBA) showing the effects of human population density (log) and vegetation cover (centered).

|                         | Estimate | SE   | t-value |
|-------------------------|----------|------|---------|
| (Intercept)             | 3.51     | 0.10 | 33.98   |
| log(population density) | -0.15    | 0.01 | -10.88  |
| Vegetation cover (c)    | 0.94     | 0.08 | 12.39   |
